# Supplementary material for: Prognostic Value of Bladder Involvement in the Outcome of Upper Tract Urothelial Carcinoma
Source: MDPI journal article supplement (doi:10.3390/diagnostics13010153), 2023-01-02
Supplement: s1 [file s1]

## Supplementary Materials

**Table S1.** Baseline clinicopathologic characteristics of both subgroups (only UTUC vs UTUC+UBC)

| Characteristics                      | Overall, n (%) | Only UTUC, n (%) | UTUC+UBC, n (%) | P-value                  |
|--------------------------------------|----------------|------------------|-----------------|--------------------------|
| <b>Number of patients (n / %)</b>    | 115 (100)      | 72 (62.6)        | 43 (37.4)       |                          |
| <b>Age (median, years)</b>           | 75 (41-94)     | 73.5 (41-91)     | 77 (55-94)      | <b>0.098<sup>a</sup></b> |
| <b>Gender</b>                        |                |                  |                 | <b>0.971<sup>b</sup></b> |
| Male                                 | 80 (69.6)      | 50 (69.4)        | 30 (69.8)       |                          |
| Female                               | 35 (30.4)      | 22 (30.6)        | 13 (30.2)       |                          |
| <b>Risk factors</b>                  |                |                  |                 |                          |
| Smoking                              | 49 (55)        | 31 (55.4)        | 18 (54.5)       | <b>0.941<sup>b</sup></b> |
| Occupational exposure                | 13 (25)        | 8 (24.2)         | 5 (26.3)        | <b>0.560<sup>b</sup></b> |
| <b>ECOG PS</b>                       |                |                  |                 | <b>0.398<sup>b</sup></b> |
| 0-1                                  | 83 (72.2)      | 50 (69.4)        | 33 (76.7)       |                          |
| ≥ 2                                  | 32 (27.8)      | 22 (30.6)        | 10 (23.3)       |                          |
| <b>Clinical presentation</b>         |                |                  |                 |                          |
| Gross hematuria                      | 67 (59.8)      | 43 (60.6)        | 24 (58.5)       | <b>0.833<sup>b</sup></b> |
| Hydronephrosis                       | 56 (50)        | 36 (50.7)        | 20 (48.8)       | <b>0.844<sup>b</sup></b> |
| <b>Laterality</b>                    |                |                  |                 | <b>0.257<sup>b</sup></b> |
| Left                                 | 59 (51.3)      | 34 (47.2)        | 25 (58.1)       |                          |
| Right                                | 56 (48.7)      | 38 (52.8)        | 18 (41.9)       |                          |
| <b>Primary tumor location</b>        |                |                  |                 | <b>0.355<sup>b</sup></b> |
| Renal pelvis                         | 66 (57.4)      | 45 (62.5)        | 21 (48.8)       |                          |
| Ureter                               | 33 (28.7)      | 18 (25)          | 15 (34.9)       |                          |
| Both                                 | 16 (13.9)      | 9 (12.5)         | 7 (16.3)        |                          |
| <b>Surgical procedure</b>            |                |                  |                 | <b>0.077<sup>c</sup></b> |
| Nephroureterectomy                   | 106 (92.2)     | 69 (95.8)        | 37 (86)         |                          |
| Kidney-sparing approach              | 9 (7.8)        | 3 (4.2)          | 6 (14)          |                          |
| <b>Histological subtype</b>          |                |                  |                 | <b>0.512<sup>b</sup></b> |
| Pure UC                              | 103 (89.6)     | 64 (88.9)        | 39 (90.7)       |                          |
| Non-pure UC                          | 12 (10.4)      | 8 (11.1)         | 4 (9.3)         |                          |
| <b>Lymphadenectomy</b>               |                |                  |                 | <b>0.689<sup>b</sup></b> |
| Yes                                  | 32 (28.1)      | 19 (26.8)        | 13 (30.2)       |                          |
| No                                   | 82 (71.9)      | 52 (73.2)        | 30 (69.8)       |                          |
| <b>Tumor size, cm</b>                |                |                  |                 | <b>0.984<sup>b</sup></b> |
| ≤ 2                                  | 16 (14)        | 10 (14.1)        | 6 (14)          |                          |
| > 2                                  | 98 (86)        | 61 (85.9)        | 37 (86)         |                          |
| <b>Multifocality</b>                 |                |                  |                 | <b>0.326<sup>c</sup></b> |
| Yes                                  | 11 (9.6)       | 5 (6.9)          | 6 (14)          |                          |
| No                                   | 104 (90.4)     | 67 (93.1)        | 37 (86)         |                          |
| <b>Tumor grade</b>                   |                |                  |                 | <b>0.540<sup>c</sup></b> |
| Low-grade                            | 7 (6.2)        | 4 (5.7)          | 3 (7)           |                          |
| High-grade                           | 106 (93.8)     | 66 (94.3)        | 40 (93)         |                          |
| <b>Lymphovascular invasion</b>       |                |                  |                 | <b>0.141<sup>b</sup></b> |
| Yes                                  | 38 (33.9)      | 27 (39.1)        | 11 (25.6)       |                          |
| No                                   | 74 (66.1)      | 42 (60.9)        | 32 (74.4)       |                          |
| <b>Concomitant carcinoma in situ</b> |                |                  |                 | <b>0.808<sup>b</sup></b> |
| Yes                                  | 20 (17.4)      | 13 (18.1)        | 7 (16.3)        |                          |
| No                                   | 95 (82.6)      | 59 (81.9)        | 36 (83.7)       |                          |
| <b>Tumor necrosis</b>                |                |                  |                 | <b>0.612<sup>b</sup></b> |
| Yes                                  | 16 (14.2)      | 9 (12.9)         | 7 (16.3)        |                          |
| No                                   | 97 (85.8)      | 61 (87.1)        | 36 (83.7)       |                          |
| <b>AJCC staging*</b>                 |                |                  |                 | <b>0.777<sup>c</sup></b> |
| 0is                                  | 2 (2.0)        | 2 (3.5)          | 0               |                          |
| 0a                                   | 7 (7.1)        | 4 (7.0)          | 3 (7.3)         |                          |
| I                                    | 25 (25.5)      | 15 (26.3)        | 10 (24.4)       |                          |
| II                                   | 20 (20.4)      | 10 (17.5)        | 10 (24.4)       |                          |
| III                                  | 40 (40.8)      | 23 (40.4)        | 17 (41.5)       |                          |
| IV                                   | 4 (4.1)        | 3 (5.3)          | 1 (2.4)         |                          |

|                                |            |           |           |                          |
|--------------------------------|------------|-----------|-----------|--------------------------|
| <b>Lymph node involvement</b>  |            |           |           | <b>0.053<sup>c</sup></b> |
| Yes                            | 7 (22.6)   | 7 (35)    | 0         |                          |
| No                             | 24 (77.4)  | 13 (65)   | 11 (100)  |                          |
| <b>Metastasis at diagnosis</b> |            |           |           | <b>0.013<sup>b</sup></b> |
| Yes                            | 14 (12.2)  | 13 (18.1) | 1 (2.3)   |                          |
| No                             | 101 (87.8) | 59 (81.9) | 42 (97.7) |                          |

% valid percent;

\*excluding patients with metastasis at diagnosis and locally advanced unresectable disease;

Abbreviations: AJCC – American Joint Committee on Cancer; cm - centimeter; ECOG PS – Eastern Cooperative Oncology Group Performance Status; n – number of patients; UBC – urothelial bladder cancer; UC – urothelial carcinoma; UTUC – upper tract urothelial carcinoma

<sup>a</sup> Student's t-test

<sup>b</sup> Chi-square test

<sup>c</sup> Fisher's exact test
